# Supplementary material for: A Study of Teacher and Parent's Sensitivity of Child Sexual Harassment and the POCSO Act
Source: Research Square preprint supplement (doi:10.21203/rs.3.rs-6751863/v1), 2025-06-03
Supplement: Supplementary file 1 [file 0de9db738da664e253b1476e.docx]

| Table-1. Comparative Analysis of Teacher (n=100) and Parent (n=50) Sensitivity to CSH | | | | | | |
| --- | --- | --- | --- | --- | --- | --- |
| Category | **Sub-Category** | **Respondent** | **Agree (%)** | **Disagree (%)** | **Chi-Square (χ²)** | **p-Value** |
| Physical Harassment | Affectionate touching by non-parent (child feels uneasy) | Teachers | 82 | 18 | 1.65 | 0.199 |
| Parents | 90 | 10 |
| Gender-Based Neglect | Girl caring for siblings instead of attending school | Teachers | 64 | 36 | 4.12 | 0.042 |
| Parents | 38 | 62 |
| Exploitation Causes | Forced labour/marriage due to financial struggles | Teachers | 82 | 18 | 15.83 | 0.001 |
| Parents | 48 | 52 |
| Emotional Harassment | Negative accusations/comparisons by peers/family | Teachers | 64 | 36 | 2.56 | 0.109 |
| Parents | 51 | 49 |
| Sexual Harassment | Girls as sole victims of exploitation | Teachers | 64 | 36 | 0.3 | 0.584 |
| Parents | 59 | 41 |
| Harassment Indicators | Gifts/extra attention as grooming | Teachers | 64 | 36 | 2.22 | 0.136 |
| Parents | 75 | 25 |
| Sensitivity towards POCSO Act | Identification of POCSO provisions | Teachers | 45 | 55 | 0.25 | 0.617 |
| Parents | 40 | 60 |

| Table-2. Sensitivity of POCSO Act Provisions Among Teachers and Parents | | | | |
| --- | --- | --- | --- | --- |
| Indicator’s | **Respondent** | **Responses** | **Chi-Square (χ²)** | **p-Value** |
| Awareness of reporting protocols | Teachers | 85 | 27.84 | 0.001 |
| Parents | 40 |
| Understanding of minimum punishments | Teachers | 37 | 4.12 | 0.042 |
| Parents | 22 |
| Recognition of child helpline | Teachers | 73 | 5.89 | 0.015 |
| Parents | 60 |
| Recognition of gender-based neglect as CSA | Teachers | 91 | 12.34 | 0.001 |
| Parents | 68 |
| Misconception about victims | Teachers | 64 | 0.45 | 0.502 |
| Parents | 59 |
| Socioeconomic exploitation | Teachers | 82 | 15.21 | 0.001 |
| Parents | 48 |
| Advocacy of legal | Teachers | 100 | 1.02 | 0.312 |
| Parents | 97 |
